# Supplementary material
Source: Springer Nature journal article supplement (https://www.springermedizin.de/resource/supplementary/12878_2011_54_MOESM2_ESM.pdf/9441630)

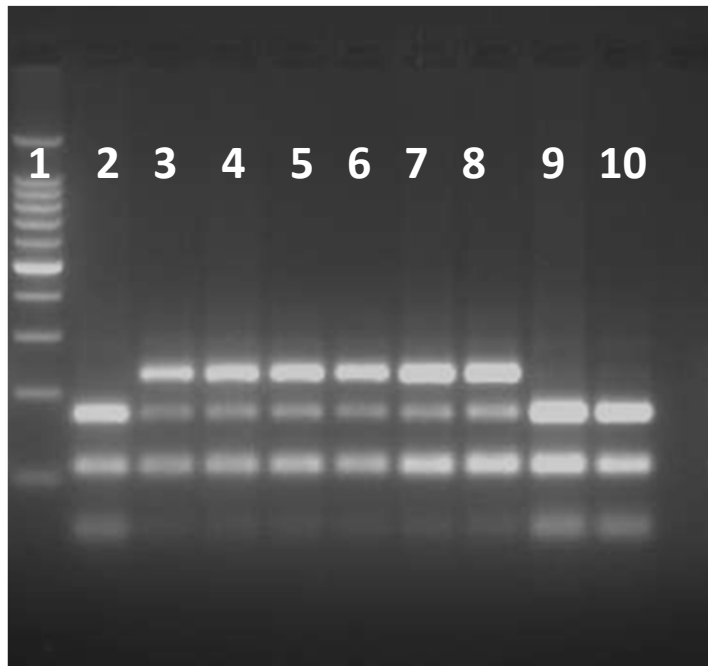

←228bp

←171bp

←106bp

←57bp

Supplement: MOESM2 [file 9441630]
